# Supplementary material
Source: Springer Nature journal article supplement (https://www.springermedizin.de/resource/supplementary/12875_2011_562_MOESM2_ESM.pdf/9434946)
Supplement: MOESM2 [file 9434946]

## Personas

 [Participantes](#)

## Actividades

[Cuestionarios](#)

 [Foros](#)

 [Recursos](#)

## Administración

 [Quitar de CUIDADOS](#)

## Diagrama de temas

### MÓDULO GENERAL

 [NOTICIAS DEL CURSO](#)

 [INTRODUCCIÓN AL CURSO](#)

### 1 MÓDULO 1

 [PRESENTACIÓN](#)

 [DEBATE MÓDULO 1](#)

#### CONTENIDOS

 [1.1.CONCEPTO GENERAL DE CUIDADOS PALIATIVOS](#)

 [1.2.PLANIFICACION DE LOS CUIDADOS PALIATIVOS](#)

[Caso Práctico 0](#)

 [1.3.MODELO BIOPSIICOSOCIAL EN CUIDADOS PALIATIVOS](#)

1.4. VALORACIÓN Y TRATAMIENTO DEL DOLOR

 [1.4.1.VALORACION Y TRATAMIENTO DEL DOLOR \(INICIO\)](#)

 [Ejercicio Inicial - VALORACION Y TRATAMIENTO DEL DOLOR](#)

 [1.4.2.VALORACION Y TRATAMIENTO DEL DOLOR \(2ª PARTE\)](#)

[Caso Práctico 1](#)

 [1.4.3.VALORACIÓN Y TRATAMIENTO DEL DOLOR \(3ª PARTE\)](#)

[Caso Práctico 2](#)

 [1.4.4.VALORACIÓN Y TRATAMIENTO DEL DOLOR \(4ª PARTE\)](#)

[Caso Práctico 3](#)

## Próximos Eventos

There are no upcoming events

[Ir a Calendario...](#)

## Usuarios en línea

(últimos 5 minutos)

 [Juan Vicente Izquierdo Soriano](#)

## Calendario

◀ julio 2010 ▶

| Lun       | Mar | Mie | Jue | Vie | Sab | Dom |
|-----------|-----|-----|-----|-----|-----|-----|
|           |     |     | 1   | 2   | 3   | 4   |
| 5         | 6   | 7   | 8   | 9   | 10  | 11  |
| 12        | 13  | 14  | 15  | 16  | 17  | 18  |
| 19        | 20  | 21  | 22  | 23  | 24  | 25  |
| <b>26</b> | 27  | 28  | 29  | 30  | 31  |     |

 [Eventos Globales](#)  [Eventos del Curso](#)

 [Eventos de Grupo](#)  [Eventos de Usuarios](#)
